# Supplementary material for: Assessing Irrigation Challenges in Highland Regions: The Role of Geomorphology in Sustainable Water Management, a case study in Sidama Region, Ethiopia
Source: Research Square preprint supplement (doi:10.21203/rs.3.rs-8799398/v1), 2026-02-11
Supplement: Supplementary file 1 [file 0dc377cbed51fbaf525c4ee0.docx]

**Supplementary Material**

This supplementary material provides detailed methodological descriptions, additional datasets, and extended spatial outputs that support the analyses and conclusions presented in the main manuscript. The materials are intended to improve transparency, reproducibility, and interpretation of the geomorphological and irrigation assessments conducted in the Sidama highlands.

**Supplementary Methods**

**GIS and Geomorphological Analysis Procedures**

A Digital Elevation Model (DEM) with a spatial resolution of 30 m was used to derive key geomorphological parameters, including slope gradient, elevation, aspect, and drainage networks. Slope was classified into standard categories (<5%, 5–15%, 15–30%, and >30%) to evaluate its influence on surface runoff, erosion risk, and irrigation suitability. Drainage density was calculated using extracted stream networks to assess runoff concentration and hydrological response across the landscape. Landform classification was performed by integrating elevation, slope, and curvature parameters to identify ridges, valleys, plateaus, and floodplains.

**Irrigation Suitability Analysis**

Irrigation suitability mapping was carried out using a multi-criteria evaluation approach within a GIS environment. The criteria included slope, soil depth, erosion susceptibility, proximity to water sources, and landform position. Each factor was standardized and weighted based on its relative importance for irrigation sustainability in highland environments. The weighted layers were overlaid to produce irrigation suitability classes categorized as highly suitable, moderately suitable, marginally suitable, and unsuitable.

**Field Observation and Validation**

Field observations were conducted to validate GIS-based results. Observations focused on erosion features (rills, gullies, landslides), canal alignment and stability, sediment deposition, and water source reliability. GPS points and photographic records were collected to verify terrain conditions and irrigation infrastructure performance. These observations were used to cross-check spatial analysis outputs and refine interpretation.

**Supplementary Data**

**Supplementary Table S1: Household Survey Instrument**

This table presents the structured questionnaire used to collect data from irrigating households. The questionnaire covered demographic characteristics, landholding size, irrigation practices, water access, seasonal water availability, maintenance challenges, soil and water conservation practices, and farmers’ perceptions of geomorphology-related irrigation constraints.

**Supplementary Table S2: Key Informant Interview Guide**

This table outlines the guiding questions used during interviews with development agents, irrigation committee members, and local water management officials. Topics included irrigation planning and management, terrain-related challenges, erosion and sedimentation issues, institutional coordination, and the integration of indigenous knowledge into irrigation decision-making.

**Supplementary Table S3: Summary Statistics of Geomorphological Parameters**

This table provides descriptive statistics (minimum, maximum, mean, and standard deviation) for key geomorphological variables such as slope, elevation, and drainage density across the study area.

**Supplementary Figures**

- **Supplementary Figure S1:** Detailed slope classification map derived from the DEM, illustrating spatial variation in terrain steepness and its implications for irrigation development.
- **Supplementary Figure S2:** Drainage density map showing differences in surface water concentration and runoff behavior across upper catchments and valley bottoms.
- **Supplementary Figure S3:** Landform classification map identifying ridges, valleys, plateaus, and floodplains used in geomorphological evaluation.
- **Supplementary Figure S4:** Photographic documentation of field-observed erosion features, sedimentation in canals, and terrain-induced irrigation infrastructure damage.

**Purpose and Use of Supplementary Material**

The supplementary material complements the main manuscript by providing additional methodological clarity and extended datasets that could not be fully presented due to space limitations. These materials support the robustness of the geomorphological analysis and strengthen the linkage between physical landscape processes and irrigation sustainability in the Sidama highlands.
